# Supplementary material for: CD83 is a new potential biomarker and therapeutic target for Hodgkin lymphoma
Source: PubMed Central journal article supplement — Haematologica. 2018 Jan 19;103(4):655–65. doi: 10.3324/haematol.2017.178384 (PMC5865416; doi:10.3324/haematol.2017.178384), 2018-04

# CD83 is a new potential diagnostic marker of Hodgkin lymphoma and a target for therapeutic mAb development

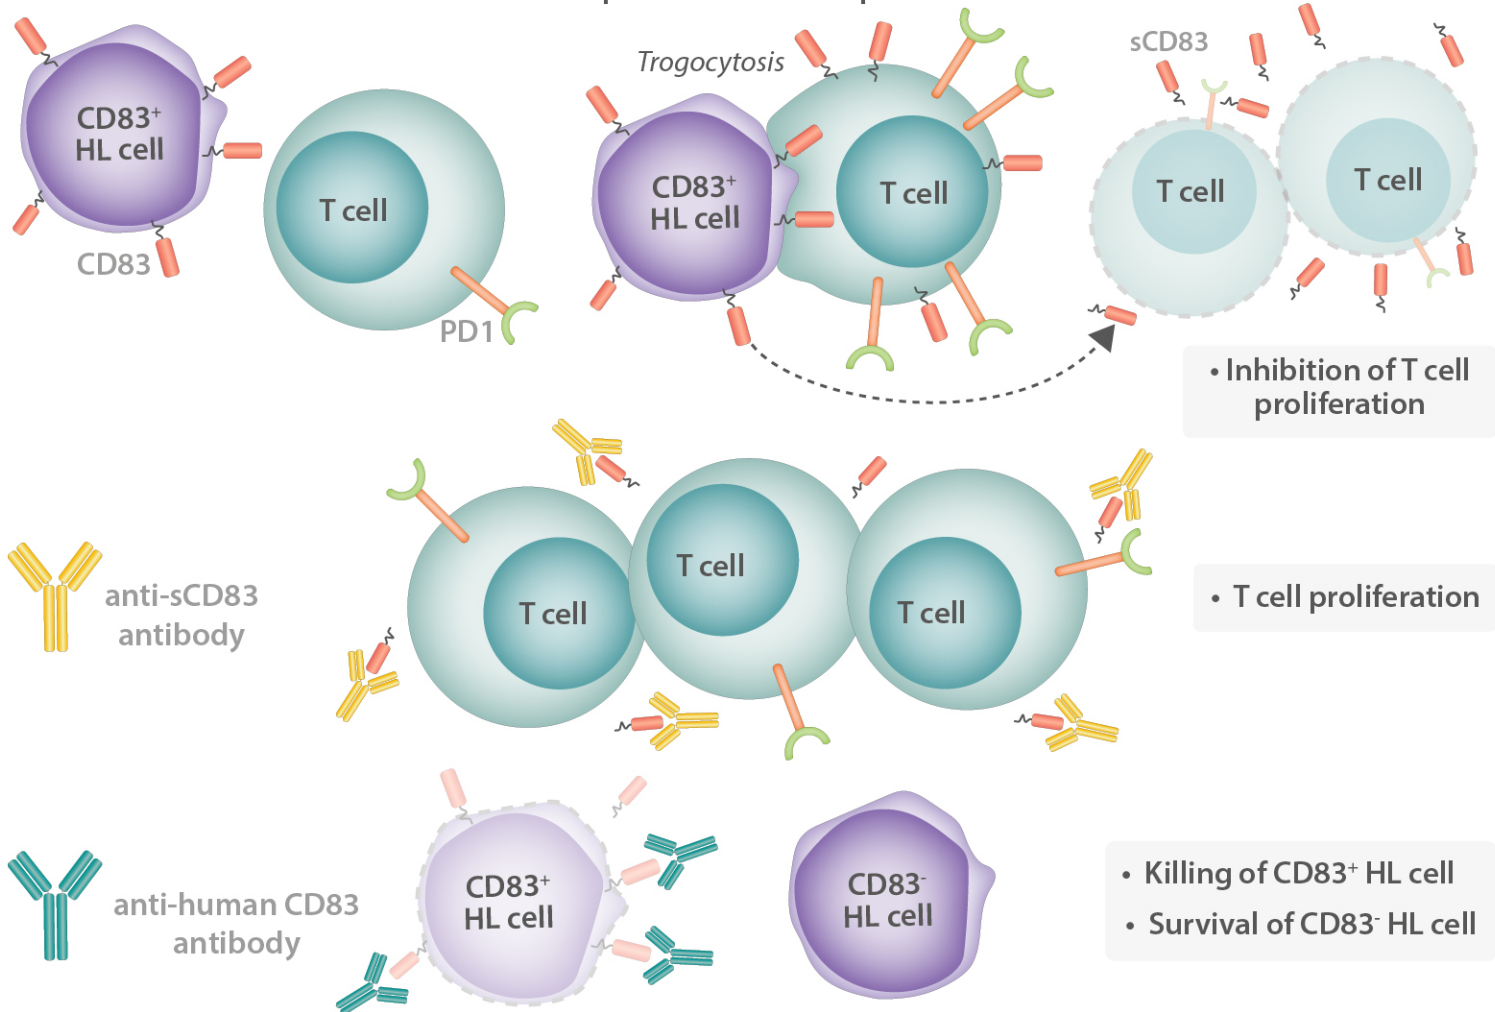

Supplement: HAEMATOL-2017-178384v4-Li-01.pdf [file HAEMATOL-2017-178384v4-Li-01.pdf]
